# Supplementary material
Source: Springer Nature journal article supplement (https://www.springermedizin.de/resource/supplementary/12888_2011_877_MOESM1_ESM.pdf/9478356)
Supplement: MOESM1 [file 9478356]

| <b>BMI (kg/m<sup>2</sup>)</b> | <b>Score</b> |
|-------------------------------|--------------|
| >20 (>30 Obese)               | =0           |
| 18.5-20                       | =1           |
| <18.5                         | =2           |

| <b>Unplanned weight loss in past 3-6 months</b> |              |
|-------------------------------------------------|--------------|
| <b>months</b>                                   | <b>Score</b> |
| <5 %                                            | =0           |
| 5-10 %                                          | =1           |
| >10 %                                           | =2           |

If patient is acutely ill and there has been or is likely to be no nutritional intake for > 5 days

**Score 2**

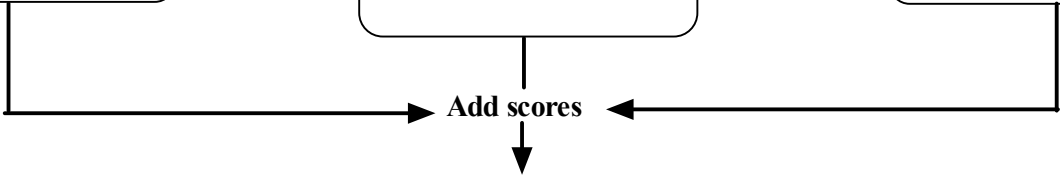

| <b>Overall risk of malnutrition</b> |                |                 |
|-------------------------------------|----------------|-----------------|
| <b>Score=0</b>                      | <b>Score=1</b> | <b>Score ≥2</b> |
| Low risk                            | Medium Risk    | High Risk       |

The "Malnutrition Universal Screening Tool" is reproduced here with the kind permission of BAPEN (British Association for Parenteral and Enteral Nutrition). For further information on 'MUST' and management guidelines, see [www.bapen.org.uk](http://www.bapen.org.uk).
